# Supplementary material for: Deep Sequencing Insights in Therapeutic shRNA Processing and siRNA Target Cleavage Precision
Source: PubMed Central journal article supplement — Mol Ther Nucleic Acids. 2014 Feb 4;3(2):e145–. doi: 10.1038/mtna.2013.73 (PMC3951910; doi:10.1038/mtna.2013.73), 2014-02-04
Supplement: mtna201373x1.pdf [file mtna201373x1.pdf]

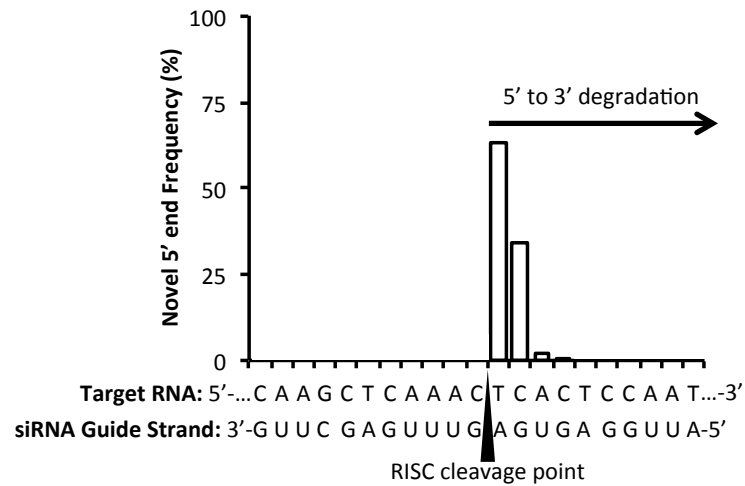

**Supplementary figure 1: Predicted profile of RACE-Seq products generated by siRNA experiments.** siRNA-directed, RISC-mediated cleavage of a targeted RNA is expected to yield a single novel 5' end opposite positions 10-11 from the 5' end of siRNA antisense strand (black triangle). However, given the sensitivity of NGS, degradation products on account of 5' to 3' RNA exonuclease activity (horizontal arrow) could be expected yielding additional novel 5' ends. The compound profile would thus appear as novel 5' ends of descending frequency heading away from the RISC cleavage point towards the 3' end of the target RNA, or 5' end of the siRNA antisense strand.
